# Supplementary material for: Effect of a Computer-Based Decision Support Intervention on Autism Spectrum Disorder Screening in Pediatric Primary Care Clinics: A Cluster Randomized Clinical Trial
Source: PubMed Central journal article supplement (PMC6991212; doi:10.1001/jamanetworkopen.2019.17676), 2019-12-18
Supplement: jamanetwopen-2-e1917676-s002.pdf [file jamanetwopen-2-e1917676-s002.pdf]

## Data Sharing Statement

Downs. Effect of a Computer-Based Decision Support Intervention on Autism Spectrum Disorder Screening in Pediatric Primary Care Clinics. *JAMA Netw Open*. Published December 18, 2019.

10.1001/jamanetworkopen.2019.17676

### Data

**Data available:** No

### Additional Information

**Explanation for why data not available:** Our IRB does not allow for the sharing of the study data.
